# Supplementary material
Source: PubMed Central journal article supplement (PMC4215080)

**Supplemental Figure 1. No Association of IL-1 $\beta$ , IL-6, CRP, and D-dimer with Viral Load Set Point, CD4<sup>+</sup> T-cell count, or Early HIV-1 Disease Progression.** IL-1 $\beta$ , IL-6, CRP, and D-dimer were tested in study subjects and compared to the (a) viral load set point and (b) CD4<sup>+</sup> T-cell count at the time of testing using Spearman-rank analysis. Viral load set point was significantly correlated with (c) CD4<sup>+</sup> T-cell count at the time of inflammatory protein testing. Nominal unadjusted two-sided p-values are presented. The following units were used for each test: pg/mL (IL-1 $\beta$ , IL-6), ng/mL (D-dimer),  $\mu$ g/mL (CRP), cells/mm<sup>3</sup> (CD4<sup>+</sup> T-cell count), and copies/mL (viral load set point). Subjects were categorized into high or low groups based on separation by the mean value. Log rank analysis was used to determine time-to-endpoint for (d) days from testing to CD4<sup>+</sup> T-cell count <500 cell/mm<sup>3</sup> and (e) days from testing to initiation of ART.

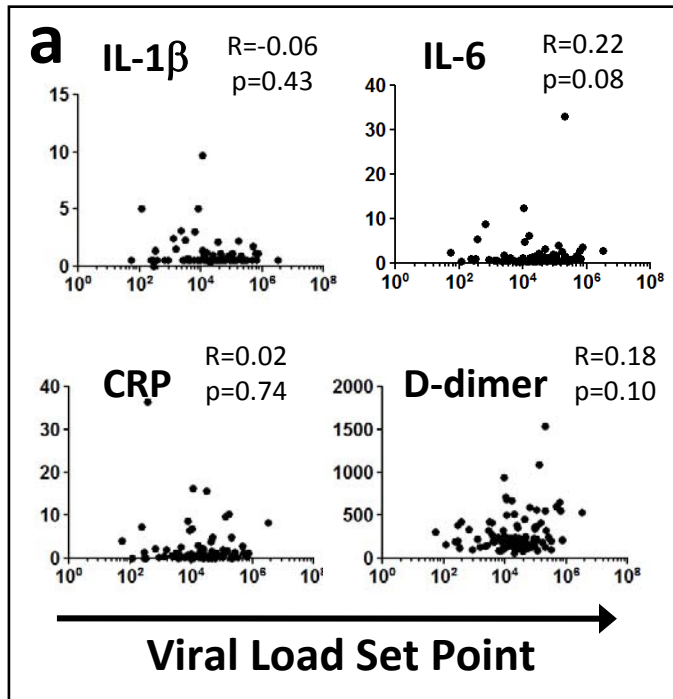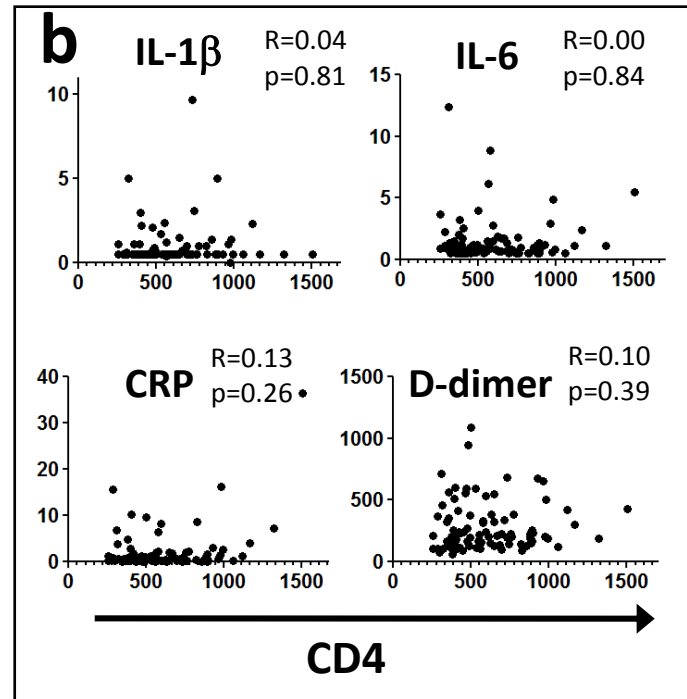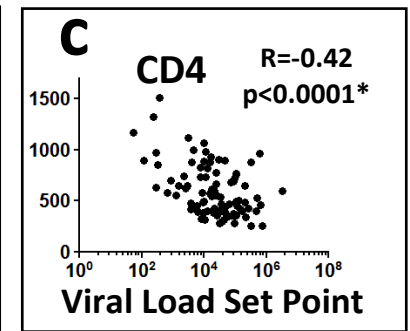

Supplemental Figure 1

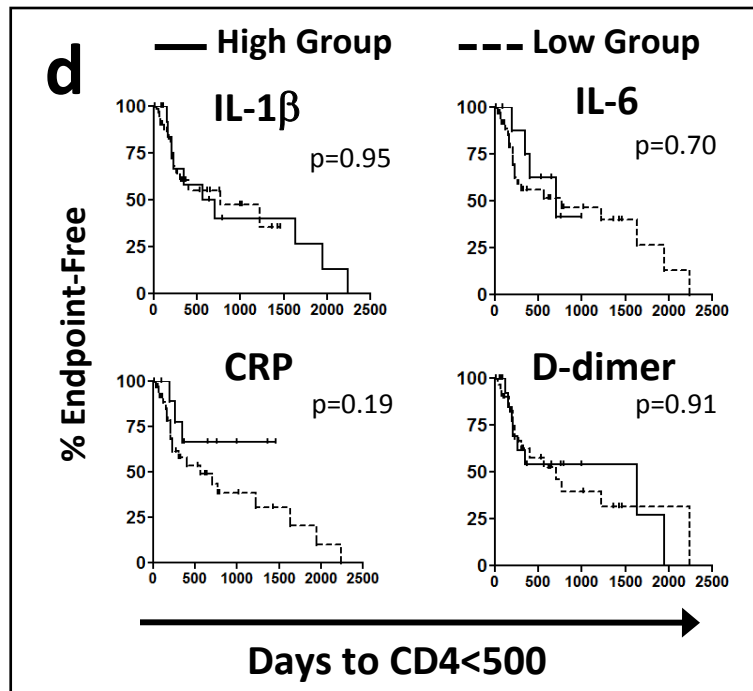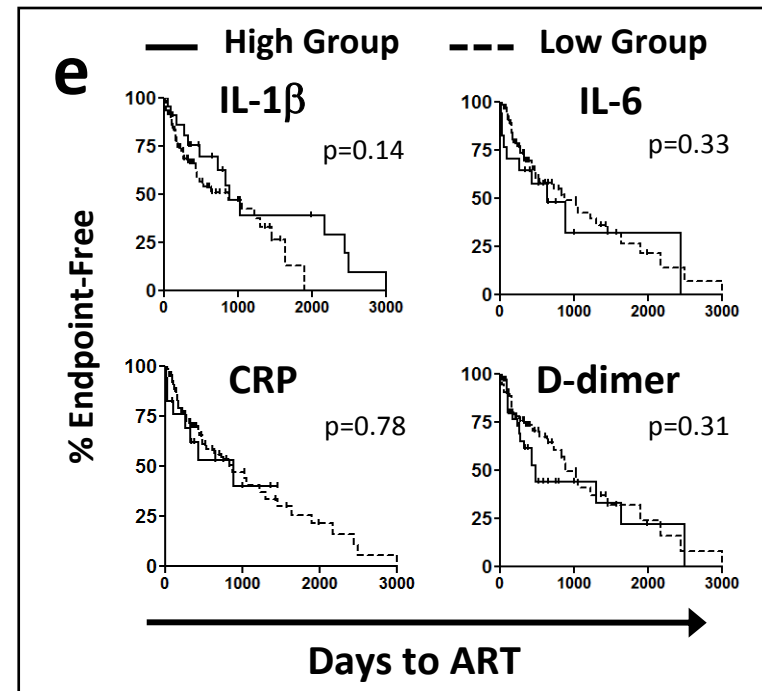

Supplement: supp_jiu206_jiu206supp_data.pdf [file supp_jiu206_jiu206supp_data.pdf]
